# Supplementary material
Source: publisher figshare collection journal article supplement (https://acs.figshare.com/ndownloader/files/4467526)
Supplement: Supplementary file 1 [file 4467526]

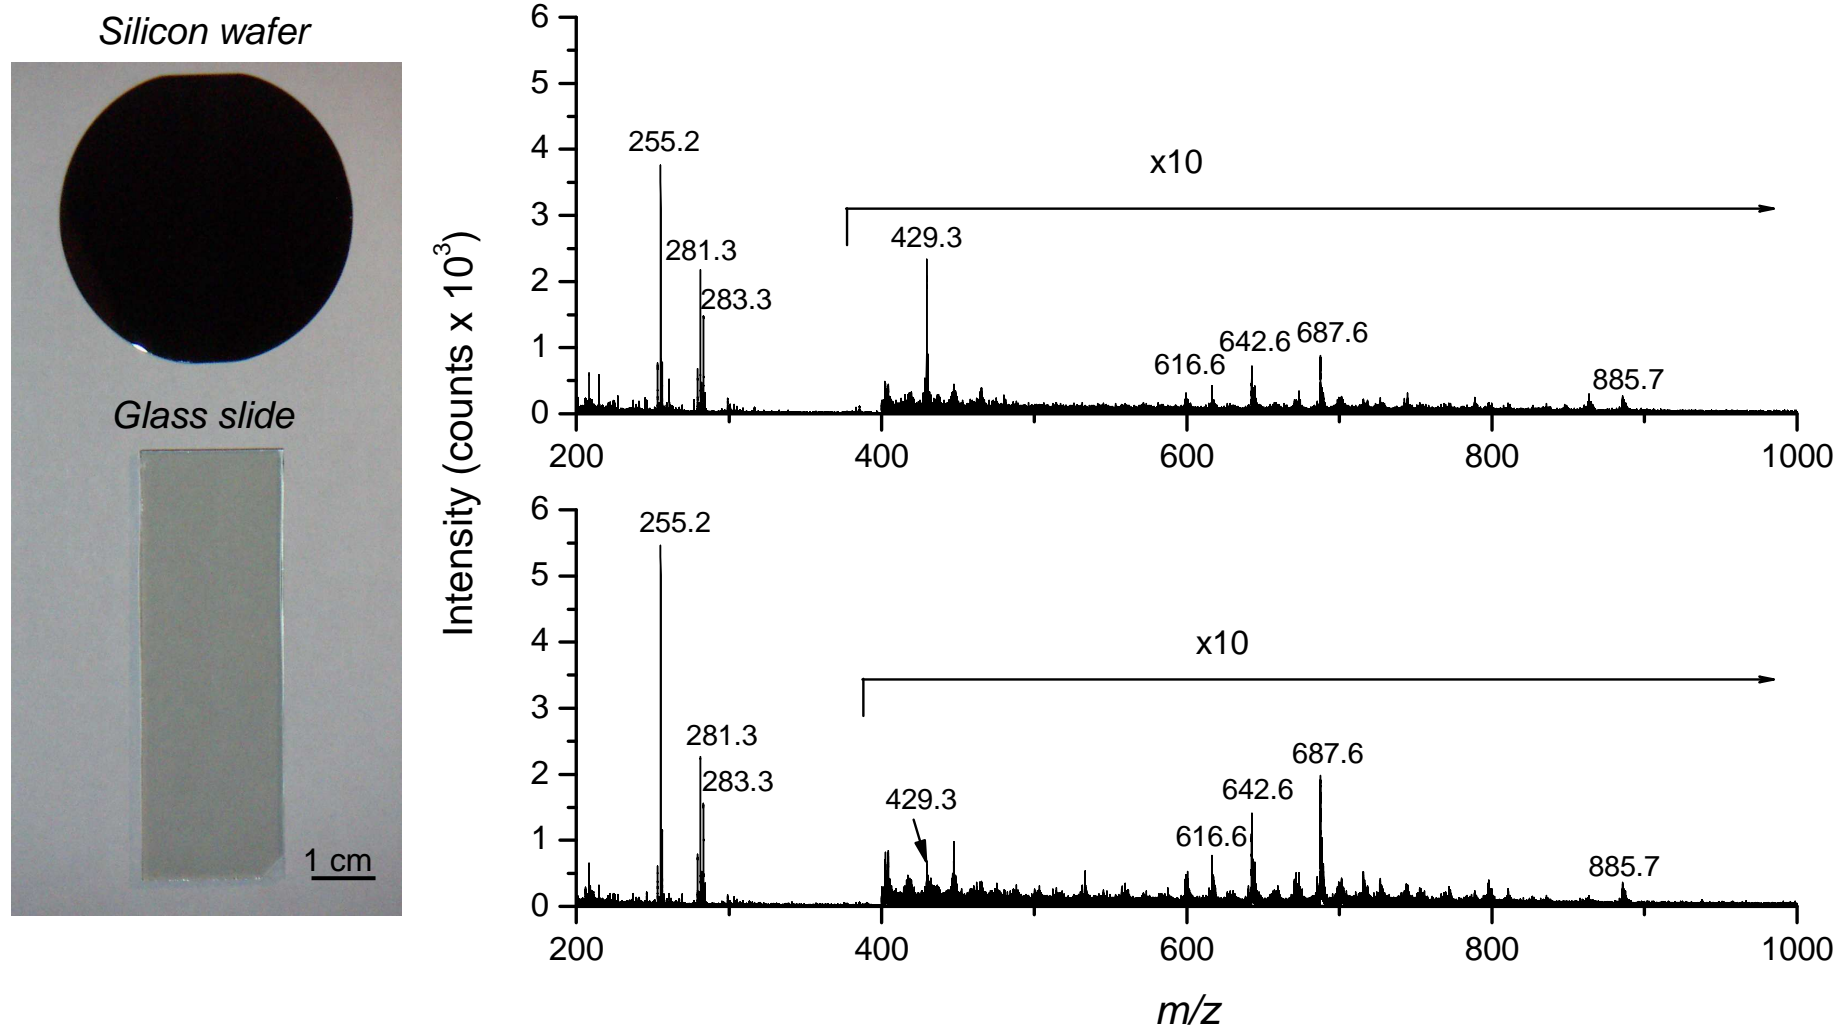

**Figure S-1.** Negative ion ToF-SIMS mass spectra on silicon wafer or gold coated glass slide. ToF-SIMS acquisitions were performed on serial tissue sections from liver cirrhosis deposited on silicon wafer or gold coated glass slide. Similar spectra were observed in terms of sensitivity and resolution on the two sample holders.
